# Supplementary material for: Supervised Exercise Program, BMI, and Risk of Type 2 Diabetes in Subjects With Normal or Impaired Fasting Glucose
Source: PubMed Central journal article supplement — Diabetes Care. 2012 Jul 14;35(8):1680–5. doi: 10.2337/dc11-2074 (PMC3402273; doi:10.2337/dc11-2074), 2012-07-14

SUPPLEMENTARY DATA

**Supplementary Table 1.** Participants' basal physical fitness test characteristics at baseline and at the end of the 2-year study. Mean ± SE. P-values derived from paired t-test.

| The basal physical fitness test       | Baseline  | Follow-up  | P      |
|---------------------------------------|-----------|------------|--------|
| Hand-grip strength measurement        | 27.6±0.17 | 29.0±0.17  | <0.001 |
| Sit-up test                           | 8.95±0.13 | 12.37±0.13 | <0.001 |
| Standing on leg with eyes closed test | 10.9±0.28 | 15.8±0.37  | <0.001 |
| Trunk Flexion Forward                 | 13.1±0.19 | 15.8±0.18  | <0.001 |
| Target Heart Rate                     | 83.5±1.87 | 107.6±1.77 | <0.001 |
| Stable Heart Rate                     | 74.6±0.22 | 75.0±0.22  | 0.063  |

Mean ± SE. P-values derived from paired t-test.

**Supplementary Figure 1.** Flow chart showing the procedure and results of screening, recruitment and classification of the study subjects.

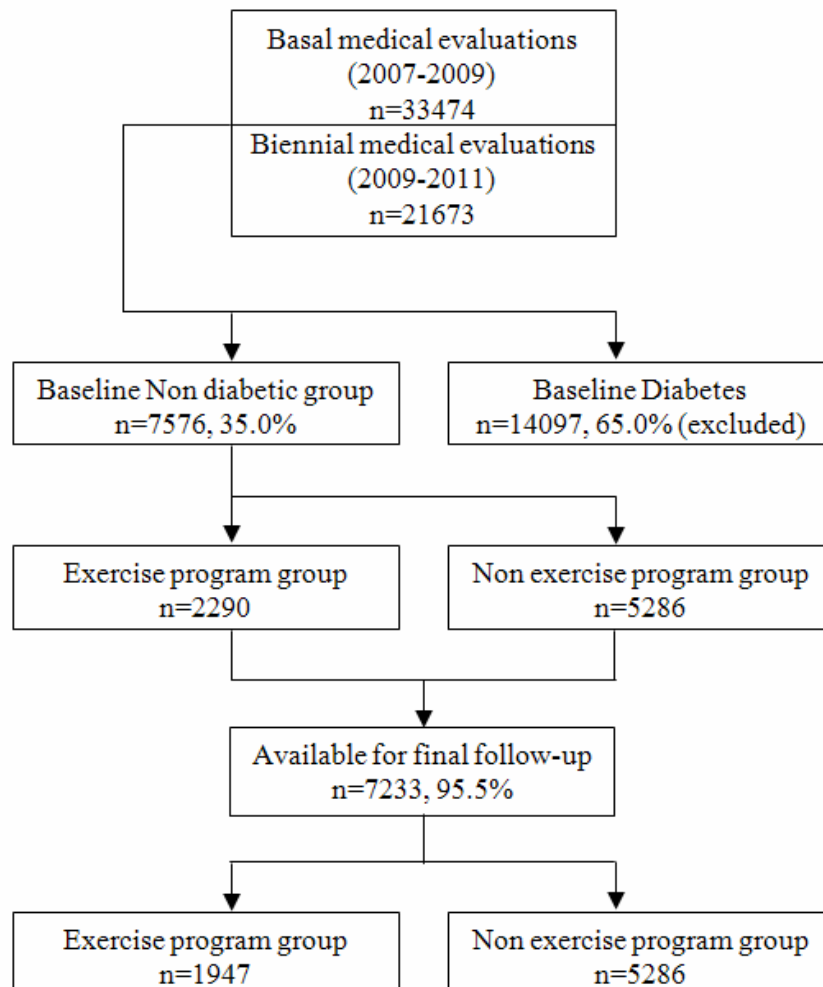

SUPPLEMENTARY DATA

**Supplementary Figure 2.** A. Odds ratio of type 2 diabetes according to exercise program and BMI. B. Exercise program and fasting glucose concentrations in normal (NFG) and impaired (IFG) fasting glucose. C. BMI and fasting glucose concentrations in NFG and IFG. Adjusted for age, sex, smoking and drinking, systolic and diastolic blood pressure, total cholesterol, and antihypertensive drug.

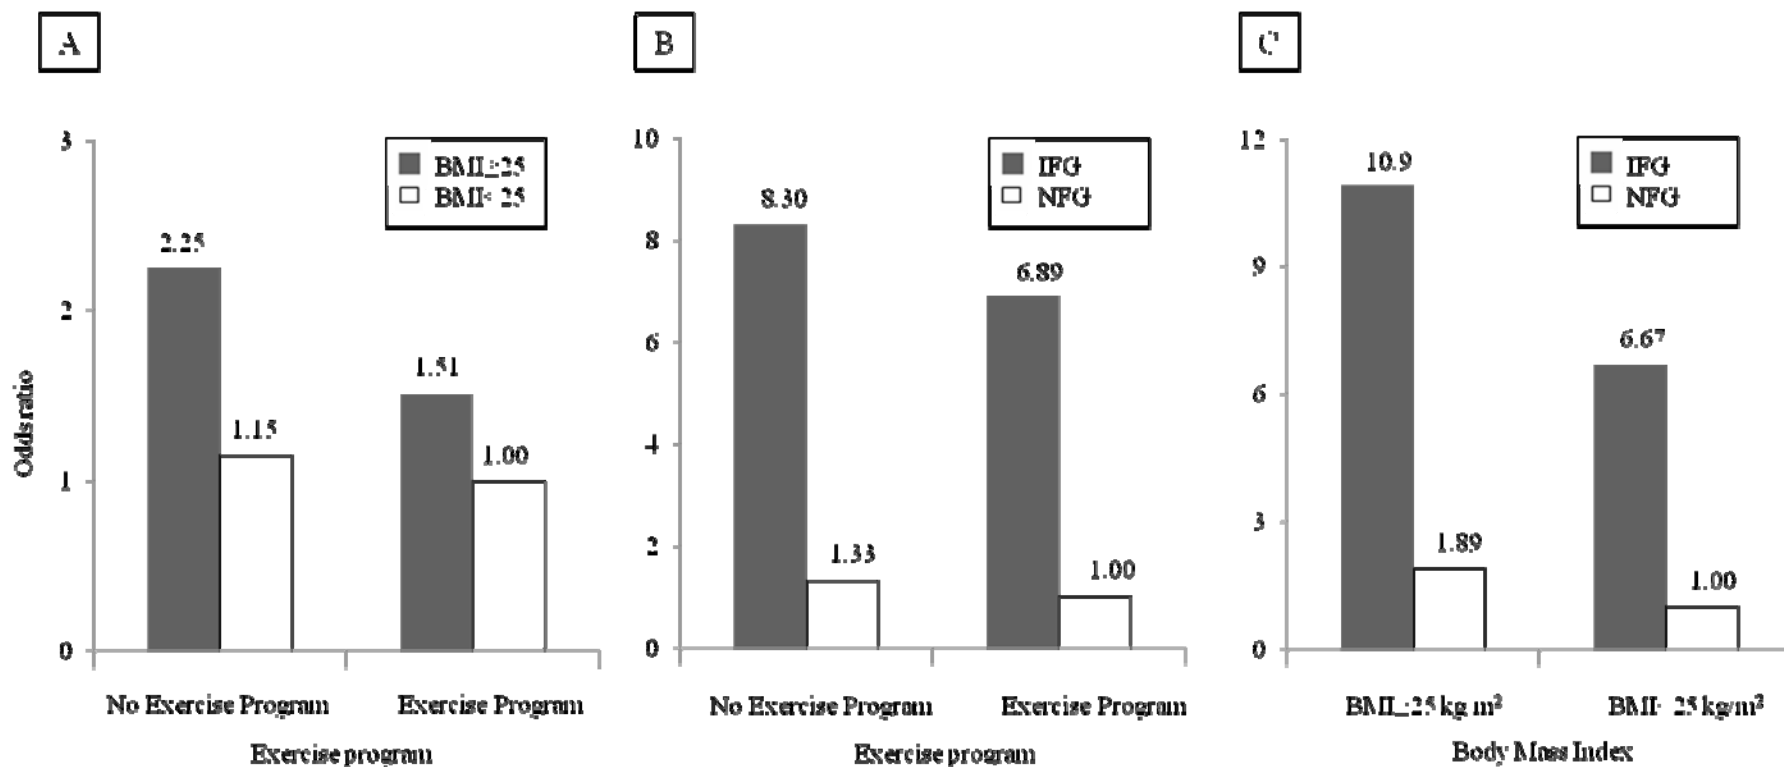

SUPPLEMENTARY DATA

**Supplementary Figure 3.** Odds ratio for type 2 diabetes according to participation in the 6-month exercise program, BMI, and fasting glucose concentrations. After adjusting for age, sex, smoking/drinking status, diastolic and systolic blood pressure, total cholesterol, and antihypertensive drug use.

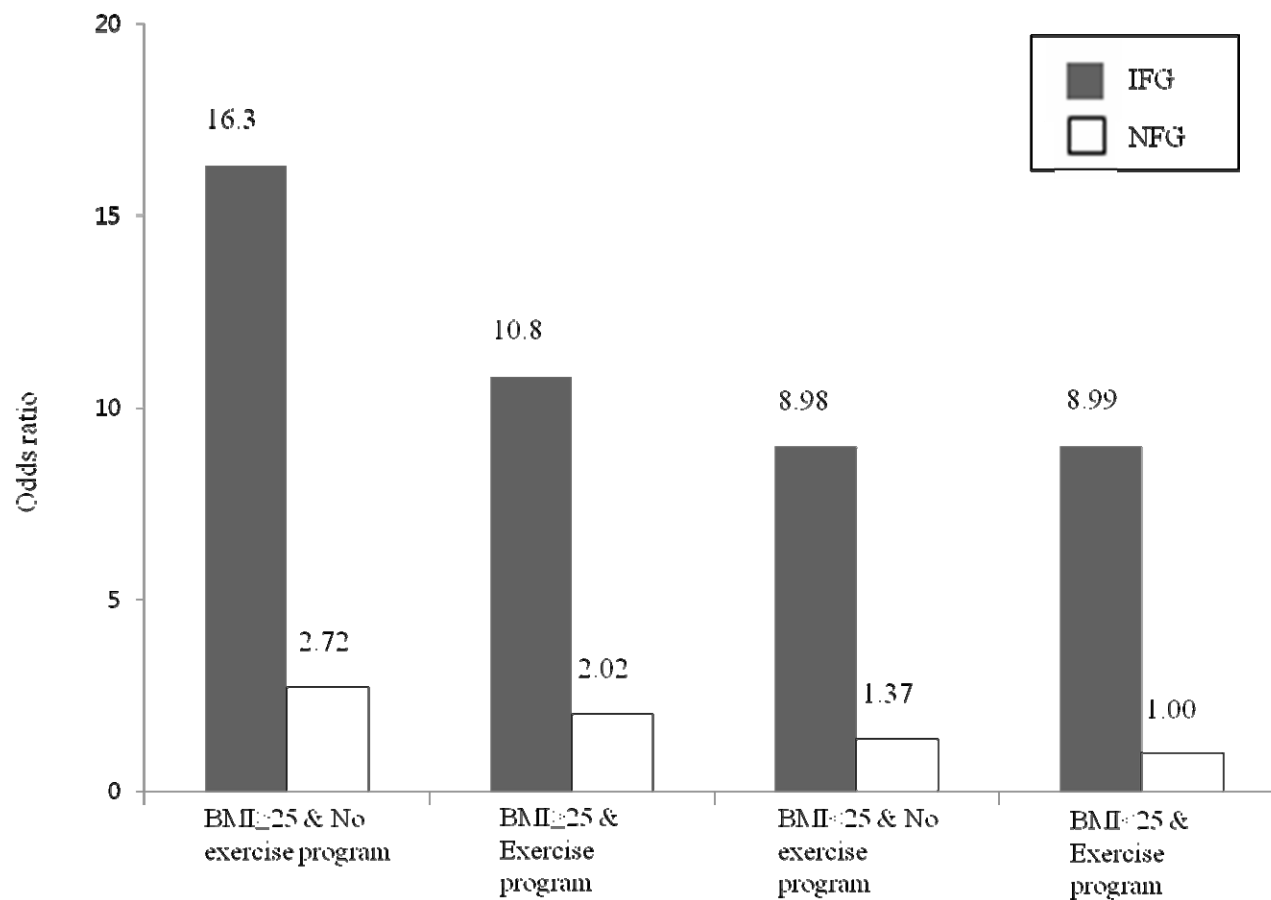

Supplement: supp_dc11-2074v112074_DC112074SupplementaryData.pdf [file supp_dc11-2074v112074_DC112074SupplementaryData.pdf]
